# Supplementary material for: Template method for fabricating interdigitate p-n heterojunction for organic solar cell
Source: PubMed Central journal article supplement (PMC3499169; doi:10.1186/1556-276x-7-469), 2012-08-21
Supplement: 1556-276X-7-469-S3.pdf [file 1556-276X-7-469-S3.pdf]

The contrast of P3HT and C<sub>60</sub> is not so clearly indicated in SEM image of cross section because the the main element for the two materials is same.

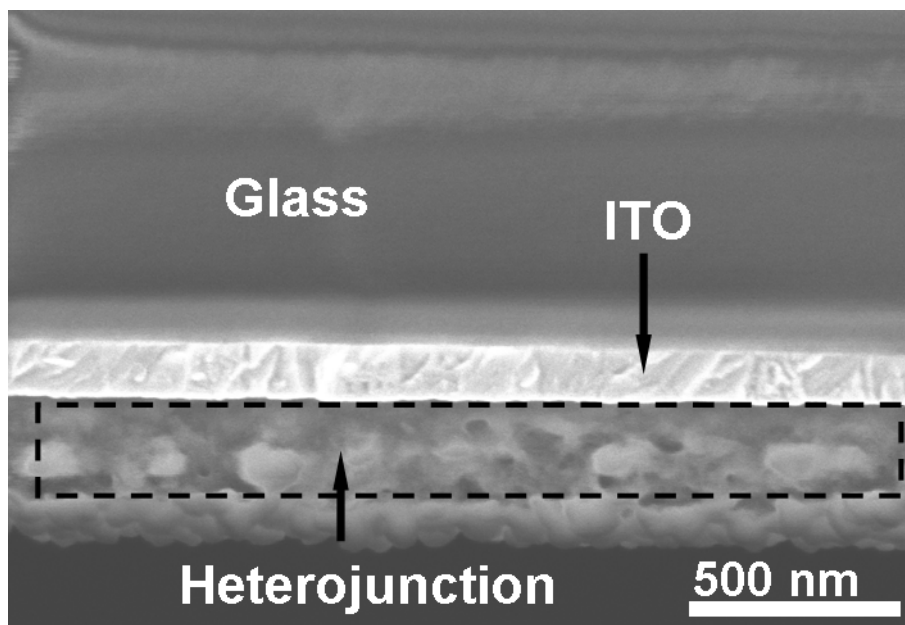

Additional file 3. (Cross section) SEM image of P3HT/ C<sub>60</sub> heterojunction. It also shows the thickness of heterojunction is less than 200 nm.
